# Supplementary material
Source: publisher figshare collection journal article supplement (https://tandf.figshare.com/ndownloader/files/33116086)
Supplement: Supplementary file 1 [file 33116086]

**Supplementary Table. Unit costs**

|  | Unit cost | Cost per hour of patient contact | Time (minutes) | Source |
| --- | --- | --- | --- | --- |
| *Medical staff visits* | | | | |
| Oncologist | £59.32 | £119 | 30 | PSSRU 2020: Consultant medical [26] |
| Radiologist | £59.32 | £119 | 30 | PSSRU 2020: Consultant medical [26] |
| Hepatologist | £59.32 | £119 | 30 | PSSRU 2020: Consultant medical [26] |
| Specialist nurse | £25.00 | £50 | 30 | PSSRU 2020: Nurse specialist (band 6) patient contact Hospital based [26] |
| Pain specialist | £75.50 | £151 | 30 | PSSRU 20120: Physiotherapist consultant community-based health care staff [26] |
| GP | £39.23 | £255 | 9.22 | PSSRU 2020: GP including direct care [26] |
| District nurse | £60.00 | £120 | 30 | PSSRU 2020: Advanced nurse (band 7) Community based [26] |
| Specialist nurse phone call | £25.00 | £50 | 30 | PSSRU 2020: Nurse specialist (band 6) patient contact, Hospital based [26] |
| Palliative care team | £116 | £116 | - | National Schedule of Reference Costs 2019-20 [25], Cancer-multidisciplinary team meetings - Other Cancer MDT Meetings |
| *Diagnostic procedures* | | | | |
| Abdominal CT | £185.15 | - | - | National Schedule of Reference Costs 2019-20 [25], RD28Z, Complex CT scan (outpatient) |
| CT chest/pelvis | £185.15 | - | - | National Schedule of Reference Costs 2019-20 [25], RD28Z, Complex CT scan (outpatient) |
| Abdominal MRI | £211.33 | - | - | National Schedule of Reference Costs 2019-20 [25], RD03Z, Magnetic Resonance Imaging Scan of One Area, with Pre- and Post-Contrast (outpatient) |
| Alpha-fetoprotein (AFP) test | £185.15 | - | - | National Schedule of Reference Costs 2019-20 [25], DAPS04: Clinical Biochemistry |
| INR | £8.40 | - | - | National Schedule of Reference Costs 2019-20 [25], DAPS05 Haematology |
| Full blood count (FBC) | £2.53 | - | - | National Schedule of Reference Costs 2019-20 [25], DAPS05 Haematology |
| Calcium (Ca++) | £1.20 | - | - | National Schedule of Reference Costs 2019-20 [25], DAPS04: Clinical Biochemistry |
| Glucose | £1.20 | - | - | National Schedule of Reference Costs 2019-20 [25], DAPS04: Clinical Biochemistry |
| Renal function | £12.00 | - | - | Calculation: Includes albumin, calcium, carbon dioxide, creatinine, chloride, glucose, phosphorous, potassium, sodium, and BUN and a calculated anion gap value |
| Complete metabolic panel | £18.27 | - | - | National Schedule of Reference Costs 2019-20 [25], DAPS04: Clinical Biochemistry |
| Glucose | £1.20 | - | - | National Schedule of Reference Costs 2019-20 [25], DAPS04: Clinical Biochemistry |
| Calcium (Ca++) | £1.20 | - | - | National Schedule of Reference Costs 2019-20 [25], DAPS04: Clinical Biochemistry |
| Electrolyte | £2.53 | - | - | National Schedule of Reference Costs 2019-20 [25], DAPS05 Haematology |
| Creatinine | £1.20 | - | - | National Schedule of Reference Costs 2019-20 [25], DAPS04: Clinical Biochemistry |
| Cholesterol | £2.53 | - | - | National Schedule of Reference Costs 2019-20 [25], DAPS05 Haematology |
| Protein levels | £1.20 | - | - | National Schedule of Reference Costs 2019-20 [25], DAPS04: Clinical Biochemistry |
| Liver function test | £8.40 | - | - | Calculation: Includes 7 tests: Albumin, Bilirubin total, Bilirubin direct, Phosphatase alkaline, Protein total, Transferase alanine amino (ALT), Transferase aspartate amino (AST) |
| Renal function | £12.00 | - | - | Calculation: includes albumin, calcium, carbon dioxide, creatinine, chloride, glucose, phosphorous, potassium, sodium, and BUN and a calculated anion gap value |
| Albumin | £1.20 | - | - | National Schedule of Reference Costs 2019-20 [25], DAPS04: Clinical Biochemistry |
| Calcium (Ca++) | £1.20 | - | - | National Schedule of Reference Costs 2019-20 [25], DAPS04: Clinical Biochemistry |
| Carbon dioxide | £1.20 | - | - | National Schedule of Reference Costs 2019-20 [25], DAPS04: Clinical Biochemistry |
| Creatinine chloride | £1.20 | - | - | National Schedule of Reference Costs 2019-20 [25], DAPS04: Clinical Biochemistry |
| Glucose | £1.20 | - | - | National Schedule of Reference Costs 2019-20 [25], DAPS04: Clinical Biochemistry |
| Phosphorus | £1.20 | - | - | National Schedule of Reference Costs 2019-20 [25], DAPS04: Clinical Biochemistry |
| Potassium | £1.20 | - | - | National Schedule of Reference Costs 2019-20 [25], DAPS04: Clinical Biochemistry |
| Sodium | £1.20 | - | - | National Schedule of Reference Costs 2019-20 [25], DAPS04: Clinical Biochemistry |
| BUN | £1.20 | - | - | National Schedule of Reference Costs 2019-20 [25], DAPS04: Clinical Biochemistry |
| Calculated anion gap value | £1.20 | - | - | National Schedule of Reference Costs 2019-20 [25], DAPS04: Clinical Biochemistry |
| Social care (cost/day) | | | | |
| Residential care | £248.00 | - | - | PSSRU 2020. 8.2 End of life care, Table 1. [26] |
| Home care | £48.00 | - | - | PSSRU 2020. 8.2 End of life care, Table 1. [26] |
| Day care | £64.00 | - | - | PSSRU 2020. Local authority own-provision day care for older people (age 65+) [26] |
| Inpatient stay | £1,613.00 | - | - | National Schedule of Reference Costs 2019-20 [25]* |

*Average of the following HRG codes weighted by the number of activities: GC12G (Malignant, Hepatobiliary or Pancreatic Disorders, without Interventions, with CC Score 6+), GC12H (Malignant, Hepatobiliary or Pancreatic Disorders, without Interventions, with CC Score 3-5), GC12J (Malignant, Hepatobiliary or Pancreatic Disorders, without Interventions, with CC Score 1-2), GC12K (Malignant, Hepatobiliary or Pancreatic Disorders, without Interventions, with CC Score 0)
